# Supplementary material for: Tuning the Seebeck effect in C60-based hybrid thermoelectric devices through temperature-dependent surface polarization and thermally-modulated interface dipoles
Source: Royal Society of Chemistry journal article supplement (doi:10.1039/c7cp01736g), 2017-01-01
Supplement: c7cp01736g1.pdf [file c7cp01736g1.pdf]

***Supporting Information***

**Tuning the Seebeck Effect in C60-based Hybrid Thermoelectric Devices through  
Temperature-dependent Surface Polarization and Thermally-modulated Interface  
Dipoles**

*Yuchun Liu<sup>1</sup>, Ling Xu<sup>1</sup>, Chen Zhao<sup>1</sup>, Ming Shao<sup>2\*</sup>, Bin Hu<sup>1,2,3\*</sup>*

*1Wu Han National Laboratory for Optoelectronics, Huazhong University of Science and Technology,  
Wu Han 430074, China*

*2 College of Science, Beijing Jiaotong University, Beijing 1000444, China*

*3Department of Materials Science and Engineering, University of Tennessee, Knoxville, TN 37996,  
USA*

*\* Corresponding authors.*

*E-mail address: mshao@bjtu.edu and bhu@utk.edu*

## 1. The XRD patterns of the oxide film on ITO glass

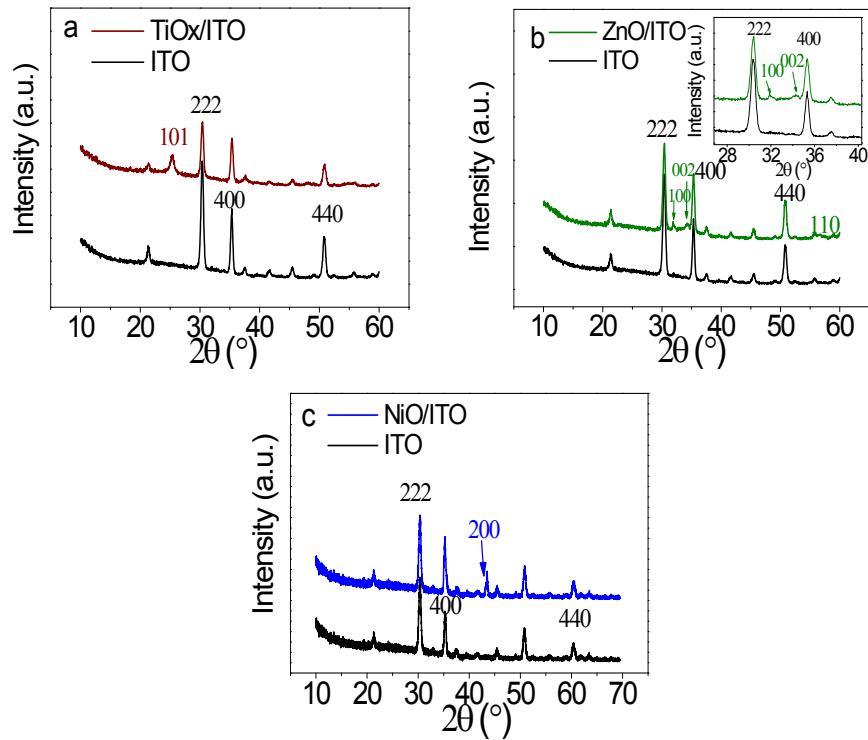

Figure S1: the XRD patterns of the oxide film prepared from the solution method: (a)  $\text{TiO}_x$ , (b)  $\text{ZnO}$ , (c)  $\text{NiO}$ . The black line is the XRD for ITO glass substrate.

## 2. The work function of the oxide film measured by Kelvin Probe

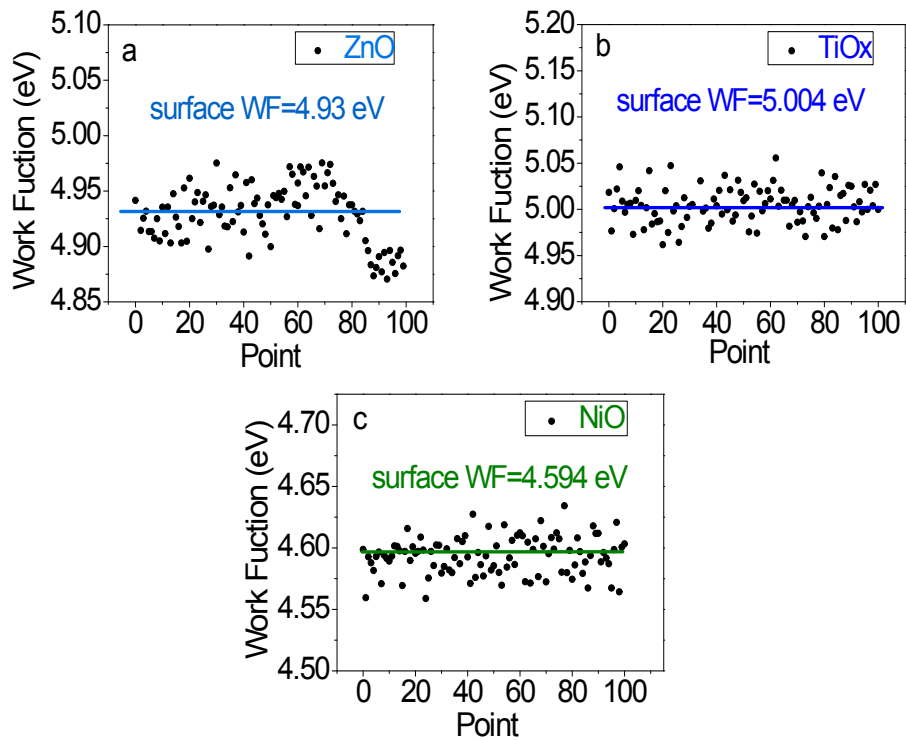

Figure S2: the work function (a)  $\text{TiO}_x$ , (b)  $\text{ZnO}$ , (c)  $\text{NiO}$ , measured from Kelvin Probe at room temperature:

### 3. The thermovoltage as a function of temperature difference in the thin-film devices

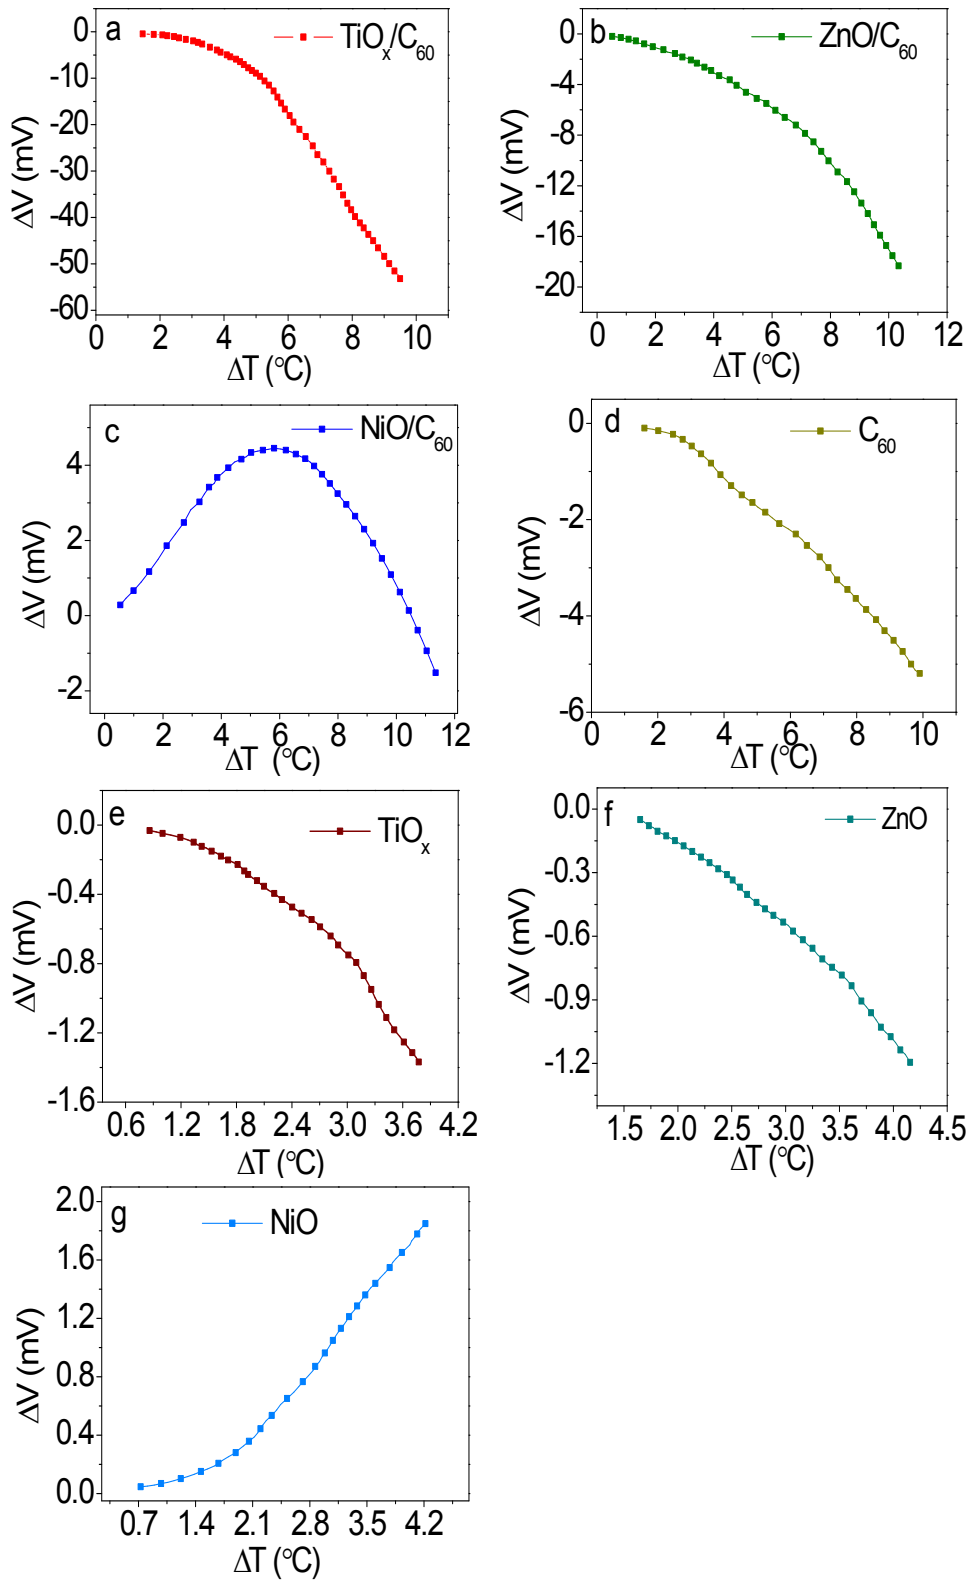

Figure S3: The thermovoltage as a function of temperature difference in the thin-film devices of (a) ITO/ $\text{TiO}_x/\text{C}_{60}/\text{Al}$ , (b) ITO/ $\text{ZnO}/\text{C}_{60}/\text{Al}$ , (c) ITO/ $\text{NiO}/\text{C}_{60}/\text{Al}$  (d) ITO/ $\text{C}_{60}/\text{Al}$ , (e) ITO/ $\text{TiO}_x/\text{Al}$ , (f) ITO/ $\text{ZnO}/\text{Al}$ , (g) ITO/ $\text{NiO}/\text{Al}$ .

#### 4. The temperature dependence of electrical conductivity in the single-layer devices

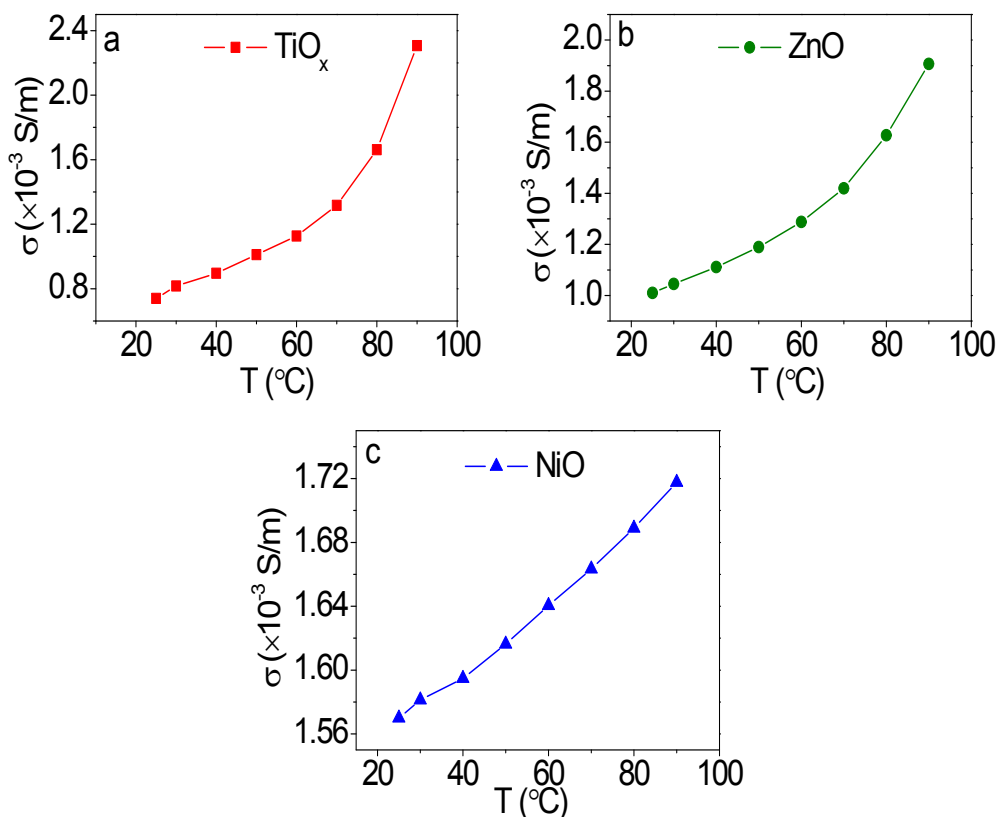

Figure S4: The temperature dependence of electrical conductivity in the single-layer devices: (a) ITO/ $\text{TiO}_x$ /Al, (b) ITO/ $\text{ZnO}$ /Al, (c) ITO/ $\text{NiO}$ /Al.

#### 5. The calculated power factor of $\text{C}_{60}$ devices

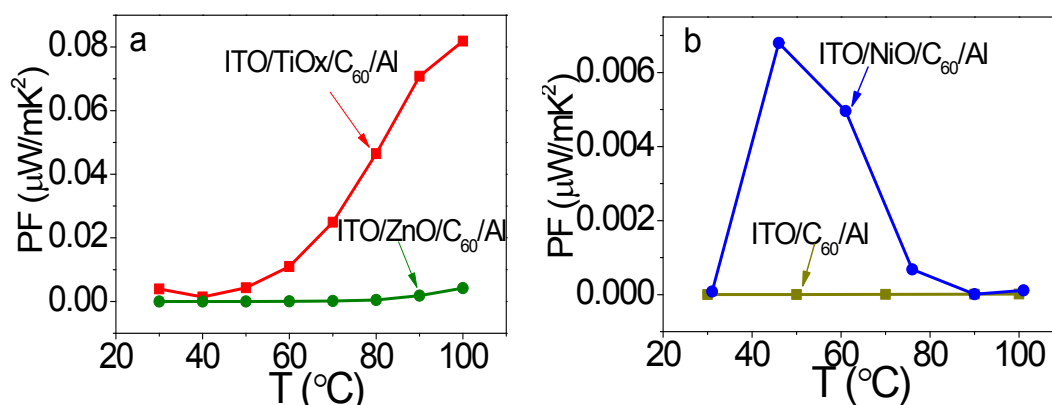

Figure S5: the calculated power factor of devices at different temperature: (a) ITO/ $\text{TiO}_x$ / $\text{C}_{60}$ /Al and ITO/ $\text{ZnO}$ / $\text{C}_{60}$ /Al, (b) ITO/ $\text{TiO}_x$ / $\text{C}_{60}$ /Al and ITO/ $\text{C}_{60}$ /Al.

| <b>Table 1</b>                            |                             |                             |                             |
|-------------------------------------------|-----------------------------|-----------------------------|-----------------------------|
| <b>DEVICE</b>                             | $\frac{V_0}{V_T}$ (AT=30°C) | $\frac{V_0}{V_T}$ (AT=45°C) | $\frac{V_0}{V_T}$ (AT=60°C) |
| ITO/C <sub>60</sub> /Al                   | 3.3%                        | 3%                          | 1.8%                        |
| Al/C <sub>60</sub> /Al                    | 4.3%                        | 3.5%                        | 2.8%                        |
| ITO/ZnO/Al                                | 2.5%                        | 1.8%                        | 1.7%                        |
| ITO/TiO <sub>x</sub> /Al                  | 1.8%                        | 1.6%                        | 2.1%                        |
| ITO/NiO/Al                                | 2.7%                        | 2.5%                        | 1.8%                        |
| ITO/ZnO/C <sub>60</sub> /Al               | 4.7%                        | 3.4%                        | 2.9%                        |
| ITO/TiO <sub>x</sub> /C <sub>60</sub> /Al | 5.8%                        | 4.8%                        | 6.3%                        |
| ITO/NiO/C <sub>60</sub> /Al               | 3.7%                        | 3.1%                        | 4.9%                        |

Table 1: The percentage of  $\frac{V_0}{V_T}$  for different devices at the average temperature of 30°C, 45°C, and 60°C, where the  $V_0$  and  $V_T$  are the measured voltage signals between the two electrodes of the devices measured without and with temperature difference, and AT is average temperature of the two electrodes.
